# Supplementary material
Source: publisher site journal article supplement (https://www.degruyter.com/publication/journal_key/TAA/downloadAsset/TAA_CFP%20Recent%20Advances%20on%20Metric%20Fixed%20Point%20Theory.pdf)
Supplement: Supplementary file 1 [file TAA_CFP%20Recent%20Advances%20on%20Metric%20Fixed%20Point%20Theory.pdf]

## RECENT ADVANCES ON METRIC FIXED POINT THEORY

### COORDINATING EDITOR

---

**Erdal KARAPINAR**, Full Professor at Mathematics, Cankaya University, Ankara, Turkey  
[erdalkarapinar@yahoo.com](mailto:erdalkarapinar@yahoo.com)

### GUEST EDITOR

---

**Wei-Shih Du**, National Kaohsiung Normal University, Taiwan  
[wdsdu@mail.nknu.edu.tw](mailto:wdsdu@mail.nknu.edu.tw)

### DESCRIPTION

---

No In the last few decades, using fixed point theory, solutions to several exciting problems have been reported. Besides the classical ordinary differential equations and integral equations, both fractional differential equations (FDE) and fractional integral equations (FIE) have taken the researchers' interests. Roughly speaking, for a better understanding of several physical phenomena, (both fractional differential equations (FDE) and fractional integral equations (FIE)) are more useful. We also note the importance of distinct abstract spaces, such as quasi-metric, b-metric, symmetric, partial metric, and dislocated metric. Sometimes, one of these spaces is more suitable for a particular application. For example, in semantic and domain theory of computer science, instead of using the standard fixed point theorem, using the corresponding characterization of fixed point results in partial metric spaces is more effective, suitable, and economical.

This Special Issue aims to collect the papers that may open rooms for the theoretical advances in the fixed-point metric theory and possible applications (as mentioned above, on fractional differential/integral equations, semantic and domain theory, and so on). We welcome both original research articles and articles discussing the current situation.

### KEY TOPICS

---

- ▶ Iterative fixed-point theory;
- ▶ Fixed point theory and applications;
- ▶ Best proximity point theory and applications;
- ▶ Recursive mappings and convergence;
- ▶ Good exposure and control in fixed point theory and FDE;
- ▶ Nonlinear problems with fixed point theory approaches.
- ▶ fixed point theorems in different abstract spaces

### ESTIMATED DATE OF SUBMISSIONS

---

Deadline for the submissions: **September 30, 2021**

## HOW TO SUBMIT

---

All submissions to the special issue must be made electronically at <https://www.editorialmanager.com/taa/default.aspx> and will undergo the standard peer review process. When submitting your paper please choose

**“SI- Recent Advances on metric fixed point theory”**

The deadline for the submissions is **September 30, 2021** but individual papers will be reviewed and published online on an ongoing basis.

Contributors to this Special Issue will benefit from:

- ▶ No article publication fees
- ▶ No Copyright constraints
- ▶ Unlimited and free Open Access for all readers
- ▶ Fair and constructive peer review provided by experts in the field
- ▶ Fast online publication of articles

We are looking forward to your submission. If you have any question, please contact us at [taa.editorial@degruyter.com](mailto:taa.editorial@degruyter.com)
